# Supplementary material
Source: publisher figshare collection journal article supplement (https://f1000.figshare.com/ndownloader/files/1593481)
Supplement: Supplementary file 1 [file 1593481]

Bee	Group	Time	Correct_all	False_all	Decision_time_all
D1	dorsal	B1	1	2	1.52
D1	dorsal	B2	1	2	1.32
D1	dorsal	B3	1	2	1.32
D1	dorsal	B4	3	0	1.04
D1	dorsal	B5	3	0	0.96
D1	dorsal	B6	2	1	1.16
D1	dorsal	B7	1	2	1
D1	dorsal	B8	1	2	1.08
D1	dorsal	B9	2	1	1.04
D1	dorsal	B10	3	0	0.92
D2	dorsal	B1	1	2	1.96
D2	dorsal	B2	2	1	2.12
D2	dorsal	B3	1	2	1.52
D2	dorsal	B4	1	2	1.64
D2	dorsal	B5	1	2	2
D2	dorsal	B6	2	1	1.8
D2	dorsal	B7	2	1	1.88
D2	dorsal	B8	1	2	1.92
D2	dorsal	B9	3	0	1.2
D2	dorsal	B10	3	0	2.04
D3	dorsal	B1	3	0	1.4
D3	dorsal	B2	3	0	2.12
D3	dorsal	B3	3	0	1.48
D3	dorsal	B4	3	0	1.48
D3	dorsal	B5	3	0	1.24
D3	dorsal	B6	1	2	1.6
D3	dorsal	B7	2	1	1.28
D3	dorsal	B8	3	0	1.04
D3	dorsal	B9	3	0	1.24
D3	dorsal	B10	1	2	1.8
D4	dorsal	B1	1	2	1.48
D4	dorsal	B2	2	1	1.48
D4	dorsal	B3	3	0	1.12
D4	dorsal	B4	2	1	1.14
D4	dorsal	B5	3	0	1.1
D4	dorsal	B6	3	0	1.08
D4	dorsal	B7	2	1	1.28
D4	dorsal	B8	3	0	0.92
D4	dorsal	B9	3	0	0.88
D4	dorsal	B10	3	0	0.88
D5	dorsal	B1	2	1	1
D5	dorsal	B2	2	1	0.88
D5	dorsal	B3	3	0	1.92
D5	dorsal	B4	3	0	0.84
D5	dorsal	B5	1	2	0.72
D5	dorsal	B6	3	0	0.8
D5	dorsal	B7	2	1	0.92
D5	dorsal	B8	2	1	0.76
D5	dorsal	B9	3	0	0.76
D5	dorsal	B10	3	0	0.8
D6	dorsal	B1	1	2	2.68
D6	dorsal	B2	2	1	1.68
D6	dorsal	B3	3	0	1.6
D6	dorsal	B4	2	1	1.24
D6	dorsal	B5	3	0	1.08
D6	dorsal	B6	3	0	1.48
D6	dorsal	B7	3	0	1
D6	dorsal	B8	3	0	0.96
D6	dorsal	B9	3	0	1.56
D6	dorsal	B10	2	1	1
D7	dorsal	B1	3	0	1
D7	dorsal	B2	3	0	0.96
D7	dorsal	B3	3	0	0.96
D7	dorsal	B4	3	0	0.84
D7	dorsal	B5	3	0	0.84
D7	dorsal	B6	3	0	0.8
D7	dorsal	B7	3	0	0.8
D7	dorsal	B8	3	0	1.04
D7	dorsal	B9	3	0	0.88
D7	dorsal	B10	3	0	0.84
D8	dorsal	B1	3	0	1.64
D8	dorsal	B2	2	1	0.92
D8	dorsal	B3	3	0	0.84
D8	dorsal	B4	3	0	0.88
D8	dorsal	B5	3	0	0.88
D8	dorsal	B6	3	0	0.88
D8	dorsal	B7	2	1	0.92
D8	dorsal	B8	3	0	0.84
D8	dorsal	B9	2	1	0.88
D8	dorsal	B10	3	0	0.88
D9	dorsal	B1	0	3	1.32
D9	dorsal	B2	0	3	1.76
D9	dorsal	B3	1	2	1.48
D9	dorsal	B4	1	2	2.24
D9	dorsal	B5	2	1	1.16
D9	dorsal	B6	1	2	1.36
D9	dorsal	B7	2	1	1.28
D9	dorsal	B8	1	2	1.52
D9	dorsal	B9	1	2	1.6
D9	dorsal	B10	2	1	1.24
V1	ventral	B1	3	0	1.08
V1	ventral	B2	3	0	1.12
V1	ventral	B3	3	0	0.84
V1	ventral	B4	3	0	0.96
V1	ventral	B5	3	0	0.88
V1	ventral	B6	3	0	0.88
V1	ventral	B7	2	1	0.8
V1	ventral	B8	3	0	1.08
V1	ventral	B9	2	1	1.12
V1	ventral	B10	2	1	0.68
V2	ventral	B1	3	0	1.28
V2	ventral	B2	2	1	1.32
V2	ventral	B3	3	0	1.72
V2	ventral	B4	2	1	1.68
V2	ventral	B5	3	0	1.88
V2	ventral	B6	3	0	1.56
V2	ventral	B7	3	0	1.36
V2	ventral	B8	3	0	0.96
V2	ventral	B9	3	0	1.2
V2	ventral	B10	1	2	1.28
V3	ventral	B1	3	0	1
V3	ventral	B2	3	0	0.92
V3	ventral	B3	3	0	0.84
V3	ventral	B4	2	1	0.8
V3	ventral	B5	3	0	0.84
V3	ventral	B6	3	0	0.72
V3	ventral	B7	2	1	0.92
V3	ventral	B8	3	0	0.84
V3	ventral	B9	3	0	0.88
V3	ventral	B10	3	0	0.88
V4	ventral	B1	3	0	1.16
V4	ventral	B2	2	1	1.2
V4	ventral	B3	3	0	1.12
V4	ventral	B4	2	1	0.96
V4	ventral	B5	3	0	1.04
V4	ventral	B6	2	1	1
V4	ventral	B7	2	1	0.92
V4	ventral	B8	2	1	0.96
V4	ventral	B9	1	2	0.96
V4	ventral	B10	3	0	0.96
V5	ventral	B1	3	0	1.04
V5	ventral	B2	1	2	2.2
V5	ventral	B3	2	1	1.04
V5	ventral	B4	2	1	1.16
V5	ventral	B5	3	0	1.16
V5	ventral	B6	2	1	1.04
V5	ventral	B7	1	2	0.68
V5	ventral	B8	3	0	0.96
V5	ventral	B9	2	1	0.84
V5	ventral	B10	2	1	0.92
V6	ventral	B1	3	0	1.08
V6	ventral	B2	2	1	2.08
V6	ventral	B3	2	1	2.8
V6	ventral	B4	3	0	1.72
V6	ventral	B5	1	2	1
V6	ventral	B6	3	0	1.56
V6	ventral	B7	2	1	1.16
V6	ventral	B8	2	1	1.04
V6	ventral	B9	1	2	1.12
V6	ventral	B10	3	0	1.12
V7	ventral	B1	2	1	0.52
V7	ventral	B2	2	1	0.52
V7	ventral	B3	1	2	0.52
V7	ventral	B4	2	1	0.6
V7	ventral	B5	3	0	1.12
V7	ventral	B6	2	1	0.88
V7	ventral	B7	3	0	1.4
V7	ventral	B8	3	0	1.2
V7	ventral	B9	3	0	1
V7	ventral	B10	2	1	1.08
V8	ventral	B1	3	0	1.12
V8	ventral	B2	3	0	1.2
V8	ventral	B3	3	0	1.44
V8	ventral	B4	2	1	1.44
V8	ventral	B5	2	1	1.68
V8	ventral	B6	2	1	1.4
V8	ventral	B7	3	0	1.82
V8	ventral	B8	1	2	2.16
V8	ventral	B9	3	0	2.84
V8	ventral	B10	1	2	2.04
V9	ventral	B1	2	1	1.72
V9	ventral	B2	3	0	1.16
V9	ventral	B3	3	0	1.08
V9	ventral	B4	3	0	1
V9	ventral	B5	3	0	1.08
V9	ventral	B6	3	0	1.2
V9	ventral	B7	3	0	0.76
V9	ventral	B8	3	0	1.2
V9	ventral	B9	3	0	1.4
V9	ventral	B10	3	0	0.96
M1	mixed	B1	2	1	1.16
M1	mixed	B2	1	2	1.88
M1	mixed	B3	1	2	1
M1	mixed	B4	3	0	1.12
M1	mixed	B5	1	2	1.4
M1	mixed	B6	2	1	0.88
M1	mixed	B7	2	1	0.8
M1	mixed	B8	3	0	1.36
M1	mixed	B9	1	2	1.28
M1	mixed	B10	1	2	1.16
M2	mixed	B1	1	2	1.56
M2	mixed	B2	2	1	1.48
M2	mixed	B3	2	1	1
M2	mixed	B4	1	2	1
M2	mixed	B5	3	0	1.36
M2	mixed	B6	2	1	2.72
M2	mixed	B7	3	0	1.88
M2	mixed	B8	3	0	1.52
M2	mixed	B9	3	0	1.44
M2	mixed	B10	3	0	1.88
M3	mixed	B1	2	1	0.88
M3	mixed	B2	2	1	1.28
M3	mixed	B3	3	0	1.48
M3	mixed	B4	1	2	1.24
M3	mixed	B5	2	1	1.64
M3	mixed	B6	1	2	1.56
M3	mixed	B7	3	0	1.68
M3	mixed	B8	1	2	1.48
M3	mixed	B9	2	1	1.32
M3	mixed	B10	3	0	1.08
M4	mixed	B1	1	2	0.84
M4	mixed	B2	2	1	0.88
M4	mixed	B3	1	2	1.4
M4	mixed	B4	1	2	0.76
M4	mixed	B5	1	2	1.12
M4	mixed	B6	1	2	0.72
M4	mixed	B7	1	2	0.8
M4	mixed	B8	3	0	0.96
M4	mixed	B9	2	1	1.08
M4	mixed	B10	1	2	1
M5	mixed	B1	2	1	1.04
M5	mixed	B2	2	1	1.44
M5	mixed	B3	2	1	1.2
M5	mixed	B4	2	1	1
M5	mixed	B5	1	2	1.48
M5	mixed	B6	3	0	1
M5	mixed	B7	3	0	0.96
M5	mixed	B8	3	0	1.16
M5	mixed	B9	3	0	0.88
M5	mixed	B10	2	1	1.88
M6	mixed	B1	2	1	1.64
M6	mixed	B2	3	0	1.36
M6	mixed	B3	3	0	1.28
M6	mixed	B4	3	0	1.36
M6	mixed	B5	2	1	1.4
M6	mixed	B6	3	0	1.2
M6	mixed	B7	1	2	1.28
M6	mixed	B8	3	0	1.2
M6	mixed	B9	2	1	0.96
M6	mixed	B10	1	1	1.06
M7	mixed	B1	2	1	1.28
M7	mixed	B2	2	1	1.36
M7	mixed	B3	2	1	1.68
M7	mixed	B4	3	0	1.2
M7	mixed	B5	1	2	1.32
M7	mixed	B6	1	2	1.28
M7	mixed	B7	3	0	1.6
M7	mixed	B8	2	1	1.24
M7	mixed	B9	2	1	1.04
M7	mixed	B10	1	2	1.04
M8	mixed	B1	1	2	1.04
M8	mixed	B2	3	0	1.08
M8	mixed	B3	2	1	1.4
M8	mixed	B4	2	1	1.16
M8	mixed	B5	1	2	1.44
M8	mixed	B6	3	0	0.68
M8	mixed	B7	3	0	1.4
M8	mixed	B8	3	0	0.88
M8	mixed	B9	3	0	0.64
M8	mixed	B10	2	1	1.16
M9	mixed	B1	1	2	2.36
M9	mixed	B2	2	1	1.96
M9	mixed	B3	2	1	1.52
M9	mixed	B4	2	1	2.96
M9	mixed	B5	1	2	2.8
M9	mixed	B6	2	1	2.16
M9	mixed	B7	2	1	1.84
M9	mixed	B8	3	0	1.4
M9	mixed	B9	3	0	1.44
M9	mixed	B10	2	1	1.24
